# Supplementary material
Source: PubMed Central journal article supplement (PMC5521975)

SUPPLEMENTARY DATA

**The Risk of Severe Hypoglycemia in Type 1 Diabetes Over 30 years of Follow-up in the DCCT/EDIC Study**

The Diabetes Control and Complications Trial (DCCT)/Epidemiology of Diabetes Interventions and Complications (EDIC) Research Group\*

**Supplementary Table S1. Characteristics of subjects at DCCT closeout (1993) by treatment group**

|                                 | DCCT Closeout           |                          |
|---------------------------------|-------------------------|--------------------------|
|                                 | Conventional            | Intensive                |
| <b>Number of subjects</b>       | 708                     | 699                      |
| <b>Demographics</b>             |                         |                          |
| Gender (% female)               | 46.3                    | 49.2                     |
| Age (years)                     | 33.1 ± 7.0              | 33.7 ± 7.0               |
| Race (% Caucasian)              | 96.3                    | 96.4                     |
| Overweight (%)                  |                         |                          |
| Male (BMI >27.8)                | 19.6                    | 29.8*                    |
| Female (BMI >27.3)              | 19.4                    | 38.0†                    |
| Education (years)               | 14.9 ± 1.6              | 14.9 ± 1.6               |
| <b>Clinical history</b>         |                         |                          |
| Duration (years)                |                         |                          |
| Primary cohort                  | 8.5 ± 2.4               | 8.6 ± 2.3                |
| Secondary cohort                | 15.5 ± 4.1              | 15.9 ± 4.0               |
| HbA1c [% (mmol/mol)]            | 9.1 ± 1.5 (76.4 ± 16.9) | 7.4 ± 1.1 (57.3 ± 12.0)† |
| Mean DCCT HbA1c [% (mmol/mol)]  | 9.1 ± 1.3 (75.9 ± 13.9) | 7.2 ± 0.9 (55.6 ± 10.1)† |
| Insulin dose (U/kg/day)         | 0.66 ± 0.20             | 0.70 ± 0.25†             |
| Regimen (%)                     |                         |                          |
| CSII                            | 1.6                     | 41.0†                    |
| MDI                             | 3.3                     | 56.3                     |
| Standard                        | 95.2                    | 2.7                      |
| Systolic blood pressure (mmHg)  | 116.5 ± 11.9            | 116.6 ± 11.5             |
| Diastolic blood pressure (mmHg) | 74.3 ± 8.9              | 74.8 ± 8.7               |

Data are means ± SD, unless otherwise indicated.

CSII=Continuous subcutaneous insulin infusion; MDI=Multiple daily injections

\*Difference between treatment groups is significant, P<0.01

†Difference between treatment groups is significant, P<0.001

SUPPLEMENTARY DATA

**Supplementary Table S2A. Subgroup analyses for severe hypoglycemia in EDIC\* by DCCT closeout characteristics**

| DCCT Closeout Characteristics  | Conventional (N=708) |       |        |      |          |         | Intensive (N=699) |        |      |          |               |         |           |         |
|--------------------------------|----------------------|-------|--------|------|----------|---------|-------------------|--------|------|----------|---------------|---------|-----------|---------|
|                                | % with               |       | # of   |      | Mean     | Diff in | % with            |        | # of |          | Mean          | Diff in | Rel. Risk | Diff in |
|                                | N                    | Event | Events | Rate | Rate, P= | N       | Event             | Events | Rate | Rate, P= | 95% CI        | RR, P=  |           |         |
| <u>Cohort</u>                  |                      |       |        |      |          |         |                   |        |      |          |               |         |           |         |
| Primary                        | 341                  | 50.4  | 658    | 37.8 | 0.6636   | 357     | 51.0              | 851    | 45.7 | 0.1008   | 1.2(0.9, 1.6) | 0.3695  |           |         |
| Secondary                      | 367                  | 48.8  | 672    | 35.5 |          | 342     | 51.5              | 632    | 35.7 |          | 1.0(0.8, 1.3) |         |           |         |
| <u>Gender</u>                  |                      |       |        |      |          |         |                   |        |      |          |               |         |           |         |
| Male                           | 380                  | 48.4  | 703    | 36.2 | 0.8837   | 355     | 49.3              | 729    | 39.5 | 0.6650   | 1.1(0.8, 1.5) | 0.8285  |           |         |
| Female                         | 328                  | 50.9  | 627    | 37.0 |          | 344     | 53.2              | 754    | 42.2 |          | 1.1(0.9, 1.5) |         |           |         |
| <u>Age</u>                     |                      |       |        |      |          |         |                   |        |      |          |               |         |           |         |
| Adolescent                     | 98                   | 57.1  | 244    | 47.6 | 0.0749   | 90      | 63.3              | 240    | 51.9 | 0.1190   | 1.1(0.7, 1.7) | 0.8892  |           |         |
| Adult                          | 610                  | 48.4  | 1086   | 34.8 |          | 609     | 49.4              | 1243   | 39.2 |          | 1.1(0.9, 1.4) |         |           |         |
| <u>Education (years)</u>       |                      |       |        |      |          |         |                   |        |      |          |               |         |           |         |
| <12-16                         | 361                  | 51.2  | 687    | 37.4 | 0.7296   | 342     | 53.5              | 801    | 45.3 | 0.1757   | 1.2(0.9, 1.6) | 0.4575  |           |         |
| >=16                           | 344                  | 47.4  | 634    | 35.6 |          | 352     | 49.1              | 678    | 36.9 |          | 1.0(0.8, 1.4) |         |           |         |
| <u>Level of exercise</u>       |                      |       |        |      |          |         |                   |        |      |          |               |         |           |         |
| Strenuous                      | 49                   | 53.1  | 136    | 55.1 | 0.1525   | 44      | 45.5              | 118    | 52.5 | 0.8312   | 1.0(0.4, 2.4) | 0.4073  |           |         |
| Hard                           | 33                   | 39.4  | 36     | 20.6 |          | 37      | 51.4              | 92     | 47.5 |          | 2.3(1.0, 5.4) |         |           |         |
| Moderate                       | 393                  | 52.9  | 729    | 35.9 |          | 353     | 52.7              | 724    | 39.4 |          | 1.1(0.8, 1.4) |         |           |         |
| Mild                           | 228                  | 44.3  | 423    | 36.6 |          | 259     | 50.2              | 545    | 40.6 |          | 1.1(0.8, 1.6) |         |           |         |
| <u>Body Mass Index (kg/m2)</u> |                      |       |        |      |          |         |                   |        |      |          |               |         |           |         |
| <25                            | 376                  | 51.3  | 763    | 39.7 | 0.2266   | 280     | 48.2              | 542    | 37.6 | 0.0497   | 0.9(0.7, 1.3) | 0.1789  |           |         |
| 25-30                          | 293                  | 48.1  | 512    | 33.9 |          | 282     | 53.2              | 716    | 48.6 |          | 1.4(1.0, 2.0) |         |           |         |
| >=30                           | 39                   | 43.6  | 55     | 27.0 |          | 137     | 53.3              | 225    | 31.4 |          | 1.2(0.7, 1.9) |         |           |         |

## SUPPLEMENTARY DATA

### T1D Duration (years)

|      |     |      |     |      |        |     |      |     |      |        |               |        |
|------|-----|------|-----|------|--------|-----|------|-----|------|--------|---------------|--------|
| <8   | 179 | 52.0 | 383 | 41.4 | 0.3906 | 172 | 50.0 | 382 | 42.9 | 0.7710 | 1.0(0.7, 1.6) | 0.9120 |
| 8-16 | 367 | 46.9 | 625 | 33.3 |        | 336 | 52.1 | 672 | 38.6 |        | 1.2(0.9, 1.5) |        |
| >16  | 162 | 53.1 | 322 | 38.8 |        | 191 | 50.8 | 429 | 42.9 |        | 1.1(0.8, 1.6) |        |

### Mean DCCT HbA1c (%)

|             |     |      |     |      |        |     |      |     |      |        |               |        |
|-------------|-----|------|-----|------|--------|-----|------|-----|------|--------|---------------|--------|
| <7.032      | 32  | 56.3 | 64  | 38.7 | 0.2667 | 320 | 52.8 | 642 | 38.4 | 0.8185 | 1.0(0.5, 1.8) | 0.5544 |
| 7.032-7.941 | 103 | 52.4 | 155 | 28.7 |        | 249 | 47.0 | 547 | 42.0 |        | 1.5(1.0, 2.2) |        |
| 7.941-9.161 | 248 | 52.4 | 437 | 34.0 |        | 103 | 55.3 | 245 | 46.1 |        | 1.4(0.9, 2.0) |        |
| 9.161+      | 325 | 45.8 | 674 | 40.9 |        | 27  | 55.6 | 49  | 38.7 |        | 0.9(0.5, 1.7) |        |

### Insulin dose (U/kg)

|         |     |      |     |      |        |     |      |     |      |        |               |        |
|---------|-----|------|-----|------|--------|-----|------|-----|------|--------|---------------|--------|
| <0.635  | 377 | 50.9 | 720 | 37.0 | 0.8588 | 318 | 50.6 | 747 | 45.2 | 0.1979 | 1.2(0.9, 1.6) | 0.4160 |
| >=0.635 | 331 | 48.0 | 610 | 36.1 |        | 381 | 51.7 | 736 | 37.2 |        | 1.0(0.8, 1.4) |        |

### Prior hypoglycemia during DCCT (coma and/or seizure)

|     |     |      |     |      |        |     |      |     |      |        |               |        |
|-----|-----|------|-----|------|--------|-----|------|-----|------|--------|---------------|--------|
| No  | 574 | 43.4 | 876 | 29.7 | 0.0000 | 432 | 39.6 | 505 | 22.4 | 0.0000 | 0.8(0.6, 1.0) | 0.0928 |
| Yes | 134 | 76.1 | 454 | 66.6 |        | 267 | 70.0 | 978 | 70.8 |        | 1.1(0.8, 1.4) |        |

### Cardiac Autonomic Neuropathy†

|     |     |      |      |      |        |     |      |      |      |        |               |        |
|-----|-----|------|------|------|--------|-----|------|------|------|--------|---------------|--------|
| No  | 621 | 49.3 | 1182 | 36.9 | 0.9265 | 635 | 51.0 | 1340 | 40.6 | 0.7801 | 1.1(0.9, 1.4) | 0.7930 |
| Yes | 78  | 51.3 | 138  | 36.0 |        | 52  | 55.8 | 116  | 43.7 |        | 1.2(0.6, 2.4) |        |

Rates defined as episodes per 100 patient-years of follow-up. Relative risk (INT vs. CONV) computed as ratio of event rates.

\*Number of events in 3-month interval prior to annual visit. Exposure is 0.25 years per patient per visit.

†CAN defined as an R-R variation <15 or an R-R 15-20 in combination with a Valsalva Ratio  $\leq 1.5$  or a decrease >10 mm Hg in diastolic blood pressure.

SUPPLEMENTARY DATA

**Supplementary Table S2B. Subgroup analyses for coma and/or seizure in EDIC\* by DCCT closeout characteristics**

|                                | Conventional (N=708) |       |        |         |          |     | Intensive (N=699) |        |      |          |               |         |
|--------------------------------|----------------------|-------|--------|---------|----------|-----|-------------------|--------|------|----------|---------------|---------|
| <b>DCCT Closeout</b>           | % with               | # of  | Mean   | Diff in |          |     | % with            | # of   | Mean | Diff in  | Rel. Risk     | Diff in |
| <b>Characteristics</b>         | N                    | Event | Events | Rate    | Rate, P= | N   | Event             | Events | Rate | Rate, P= | 95% CI        | RR, P=  |
| <u>Cohort</u>                  |                      |       |        |         |          |     |                   |        |      |          |               |         |
| Primary                        | 341                  | 27.6  | 232    | 13.3    | 0.1982   | 357 | 30.0              | 274    | 14.7 | 0.2012   | 1.1(0.7, 1.6) | 0.8753  |
| Secondary                      | 367                  | 26.7  | 201    | 10.6    |          | 342 | 26.9              | 199    | 11.2 |          | 1.1(0.7, 1.5) |         |
| <u>Gender</u>                  |                      |       |        |         |          |     |                   |        |      |          |               |         |
| Male                           | 380                  | 25.5  | 220    | 11.3    | 0.5612   | 355 | 30.1              | 258    | 14.0 | 0.4772   | 1.2(0.8, 1.8) | 0.3586  |
| Female                         | 328                  | 29.0  | 213    | 12.6    |          | 344 | 26.7              | 215    | 12.0 |          | 1.0(0.7, 1.4) |         |
| <u>Age</u>                     |                      |       |        |         |          |     |                   |        |      |          |               |         |
| Adolescent                     | 98                   | 37.8  | 89     | 17.4    | 0.0331   | 90  | 28.9              | 75     | 16.2 | 0.3570   | 0.9(0.5, 1.7) | 0.5661  |
| Adult                          | 610                  | 25.4  | 344    | 11.0    |          | 609 | 28.4              | 398    | 12.6 |          | 1.1(0.8, 1.5) |         |
| <u>Education (years)</u>       |                      |       |        |         |          |     |                   |        |      |          |               |         |
| <12-16                         | 11                   | 18.2  | 3      | 5.3     | 0.2366   | 11  | 27.3              | 12     | 23.9 | 0.2783   | 4.5(0.8,24.4) | 0.1089  |
| >=16                           | 694                  | 26.9  | 423    | 11.9    |          | 683 | 28.6              | 460    | 12.9 |          | 1.1(0.8, 1.4) |         |
| <u>Level of exercise</u>       |                      |       |        |         |          |     |                   |        |      |          |               |         |
| Strenuous                      | 49                   | 32.7  | 44     | 17.8    | 0.4505   | 44  | 34.1              | 58     | 25.8 | 0.5103   | 1.4(0.4, 4.9) | 0.8124  |
| Hard                           | 33                   | 15.2  | 11     | 6.3     |          | 37  | 24.3              | 22     | 11.4 |          | 1.8(0.5, 6.5) |         |
| Moderate                       | 393                  | 28.5  | 239    | 11.8    |          | 353 | 27.5              | 235    | 12.8 |          | 1.1(0.8, 1.6) |         |
| Mild                           | 228                  | 24.6  | 134    | 11.6    |          | 259 | 29.3              | 156    | 11.6 |          | 1.0(0.7, 1.5) |         |
| <u>Body Mass Index (kg/m2)</u> |                      |       |        |         |          |     |                   |        |      |          |               |         |
| <25                            | 376                  | 31.1  | 270    | 14.1    | 0.0924   | 280 | 28.2              | 182    | 12.6 | 0.3877   | 0.9(0.6, 1.3) | 0.1291  |
| 25-30                          | 293                  | 21.8  | 139    | 9.2     |          | 282 | 29.8              | 218    | 14.8 |          | 1.6(1.0, 2.6) |         |
| >=30                           | 39                   | 28.2  | 24     | 11.8    |          | 137 | 26.3              | 73     | 10.2 |          | 0.9(0.4, 1.7) |         |

## SUPPLEMENTARY DATA

| <u>T1D Duration (years)</u>                                 |     |      |     |      |        |     |      |     |      |        |               |        |
|-------------------------------------------------------------|-----|------|-----|------|--------|-----|------|-----|------|--------|---------------|--------|
| <8                                                          | 179 | 27.4 | 119 | 12.9 | 0.5747 | 172 | 26.7 | 143 | 16.0 | 0.4369 | 1.2(0.7, 2.3) | 0.8533 |
| 8-16                                                        | 367 | 28.1 | 204 | 10.9 |        | 336 | 28.6 | 197 | 11.3 |        | 1.0(0.8, 1.4) |        |
| >16                                                         | 162 | 24.7 | 110 | 13.3 |        | 191 | 29.8 | 133 | 13.3 |        | 1.0(0.6, 1.7) |        |
| <u>Mean DCCT HbA1c (%)</u>                                  |     |      |     |      |        |     |      |     |      |        |               |        |
| <7.032                                                      | 32  | 28.1 | 25  | 15.1 | 0.2415 | 320 | 28.1 | 214 | 12.8 | 0.1956 | 0.8(0.4, 2.0) | 0.1364 |
| 7.032-7.941                                                 | 103 | 26.2 | 59  | 10.9 |        | 249 | 28.9 | 192 | 14.7 |        | 1.3(0.8, 2.4) |        |
| 7.941-9.161                                                 | 248 | 25.0 | 121 | 9.4  |        | 103 | 30.1 | 59  | 11.1 |        | 1.2(0.7, 1.9) |        |
| 9.161+                                                      | 325 | 28.9 | 228 | 13.8 |        | 27  | 22.2 | 8   | 6.3  |        | 0.5(0.2, 1.0) |        |
| <u>Insulin dose (U/kg)</u>                                  |     |      |     |      |        |     |      |     |      |        |               |        |
| <0.635                                                      | 377 | 26.0 | 216 | 11.1 | 0.4121 | 318 | 29.2 | 239 | 14.4 | 0.3508 | 1.3(0.9, 2.0) | 0.2143 |
| >=0.635                                                     | 331 | 28.4 | 217 | 12.8 |        | 381 | 27.8 | 234 | 11.8 |        | 0.9(0.6, 1.3) |        |
| <u>Prior hypoglycemia during DCCT (coma and/or seizure)</u> |     |      |     |      |        |     |      |     |      |        |               |        |
| No                                                          | 574 | 22.1 | 275 | 9.3  | 0.0000 | 432 | 19.7 | 125 | 5.6  | 0.0000 | 0.6(0.4, 0.8) | 0.0174 |
| Yes                                                         | 134 | 48.5 | 158 | 23.2 |        | 267 | 42.7 | 348 | 25.2 |        | 1.1(0.7, 1.6) |        |
| <u>Cardiac Autonomic Neuropathy</u>                         |     |      |     |      |        |     |      |     |      |        |               |        |
| No                                                          | 621 | 27.1 | 376 | 11.7 | 0.6558 | 635 | 28.0 | 429 | 13.0 | 0.5842 | 1.1(0.8, 1.5) | 0.4910 |
| Yes                                                         | 78  | 26.9 | 52  | 13.6 |        | 52  | 34.6 | 30  | 11.3 |        | 0.8(0.4, 1.8) |        |

Rates defined as episodes per 100 patient-years of follow-up. Relative risk (INT vs. CONV) computed as ratio of event rates.

\*Number of events in 3-month interval prior to annual visit. Exposure is 0.25 years per patient per visit.

†CAN defined as an R-R variation <15 or an R-R 15-20 in combination with a Valsalva Ratio ≤1.5 or a decrease >10 mm Hg in diastolic blood pressure

SUPPLEMENTARY DATA

**Supplementary Table S3. Influence of HbA1c (time-dependent) on the risk of any severe hypoglycemia (first episode) in Poisson regression models**

|                                                           | <b>Conventional</b> |                           | <b>Intensive</b> |                           |
|-----------------------------------------------------------|---------------------|---------------------------|------------------|---------------------------|
|                                                           | $\beta$ + SE        | Relative Risk<br>(95% CI) | $\beta$ + SE     | Relative Risk<br>(95% CI) |
| DCCT: Current HbA1c (%), time-dependent, per 10% decrease | -4.47 ± 0.34        | 1.60 (1.49-1.72)          | -2.30 ± 0.35     | 1.27 (1.19-1.37)          |
| EDIC: Current HbA1c (%), time-dependent, per 10% decrease | -1.19 ± 0.34        | 1.13 (1.06-1.22)          | -1.33 ± 0.35     | 1.15 (1.07-1.24)          |

Poisson models are unadjusted for other factors. The relative risk, presented per 10% decrease in HbA1c, is 0.9<sup>β</sup>. Information about EDIC events was collected for the 3-month window prior to the annual visit. All models are significant at P<0.01.

SUPPLEMENTARY DATA

**Supplementary Table S4. Risk of any severe hypoglycemia (first episode) in EDIC jointly adjusting for DCCT closeout and time-dependent covariates**

| Severe                                                          | Conventional              |         | Intensive                 |         |
|-----------------------------------------------------------------|---------------------------|---------|---------------------------|---------|
|                                                                 | Relative Risk<br>(95% CI) | p-value | Relative Risk<br>(95% CI) | p-value |
| Male (y/n)                                                      | 0.83 (0.67-1.04)          | 0.1123  | 0.78 (0.63-0.97)          | 0.0274  |
| Adolescent (y/n)                                                | 1.30 (0.95-1.78)          | 0.1025  | 1.21 (0.89-1.65)          | 0.2316  |
| Secondary cohort (y/n)                                          | 1.04 (0.76-1.43)          | 0.8049  | 1.03 (0.75-1.40)          | 0.8637  |
| Duration of T1D (years)                                         | 0.99 (0.95-1.02)          | 0.3591  | 0.99 (0.96-1.02)          | 0.4024  |
| Current regimen (CSII/Standard), time-dependent                 | 0.60 (0.40-0.89)          | 0.0114  | 0.57 (0.33-1.00)          | 0.0506  |
| Current regimen (CSII/MDI), time-dependent                      | 0.63 (0.47-0.85)          | 0.0022  | 0.75 (0.59-0.96)          | 0.0236  |
| Current insulin dose (U/kg), time-dependent                     | 1.15 (0.72-1.83)          | 0.5666  | 1.19 (0.76-1.87)          | 0.4402  |
| History of hypoglycemia (coma and/or seizure) during DCCT (y/n) | 2.77 (2.17-3.55)          | <0.0001 | 2.52 (2.03-3.14)          | <0.0001 |
| Current HbA1c (%), time-dependent, per 10% decrease             | 1.28 (1.23-1.33)          | <0.0001 | 1.26 (1.22-1.31)          | <0.0001 |
| Coma and/or seizure                                             | Conventional              |         | Intensive                 |         |
|                                                                 | Relative Risk<br>(95% CI) | p-value | Relative Risk<br>(95% CI) | p-value |
| Male (y/n)                                                      | 0.75 (0.55-1.00)          | 0.0530  | 1.07 (0.80-1.42)          | 0.6731  |
| Adolescent (y/n)                                                | 1.69 (1.15-2.48)          | 0.0078  | 0.85 (0.55-1.31)          | 0.4560  |
| Secondary cohort (y/n)                                          | 1.21 (0.80-1.83)          | 0.3718  | 1.17 (0.78-1.75)          | 0.4554  |
| Duration of T1D (years)                                         | 0.96 (0.92-1.00)          | 0.0587  | 0.98 (0.94-1.02)          | 0.4034  |
| Current regimen (CSII/Standard), time-dependent                 | 0.51 (0.29-0.88)          | 0.0154  | 0.43 (0.21-0.88)          | 0.0211  |
| Current regimen (CSII/MDI), time-dependent                      | 0.49 (0.33-0.73)          | 0.0004  | 0.69 (0.50-0.97)          | 0.0308  |
| Current insulin dose (U/kg), time-dependent                     | 1.18 (0.63-2.20)          | 0.6078  | 0.79 (0.43-1.42)          | 0.4236  |
| History of hypoglycemia (coma and/or seizure) during DCCT (y/n) | 2.86 (2.09-3.92)          | <0.0001 | 2.74 (2.05-3.66)          | <0.0001 |
| Current HbA1c (%), time-dependent, per 10% decrease             | 1.37 (1.30-1.44)          | <0.0001 | 1.20 (1.14-1.26)          | 0.0003  |

CSII=Continuous subcutaneous insulin infusion; MDI=Multiple daily injections

Time to first event using discrete time intervals during EDIC (regardless of prior DCCT hypoglycemia). Information about EDIC events was collected for the 3-month window prior to the annual visit. All covariates are fixed effects at DCCT closeout, except for the designated time-dependent covariates. The relative risk, presented per 10% decrease in HbA1c, is 0.9<sup>β</sup>.

SUPPLEMENTARY DATA

**Supplementary Table S5. Risk of all severe hypoglycemia (all episodes) in EDIC jointly adjusting for DCCT closeout and time-dependent covariates**

| Severe                                                          | Conventional              |         | Intensive                 |         |
|-----------------------------------------------------------------|---------------------------|---------|---------------------------|---------|
|                                                                 | Relative Risk<br>(95% CI) | p-value | Relative Risk<br>(95% CI) | p-value |
| Male (y/n)                                                      | 0.95 (0.73-1.24)          | 0.7262  | 0.87 (0.65-1.16)          | 0.3389  |
| Adolescent (y/n)                                                | 1.47 (1.06-2.03)          | 0.0194  | 1.02 (0.72-1.43)          | 0.9237  |
| Secondary cohort (y/n)                                          | 1.13 (0.82-1.56)          | 0.4721  | 1.55 (0.97-2.48)          | 0.0643  |
| Duration of T1D (years)                                         | 0.98 (0.95-1.01)          | 0.1623  | 0.96 (0.91-1.01)          | 0.1000  |
| Current regimen (CSII/Standard), time-dependent                 | 0.55 (0.39-0.76)          | 0.0004  | 0.51 (0.33-0.78)          | 0.0018  |
| Current regimen (CSII/MDI), time-dependent                      | 0.62 (0.49-0.78)          | <0.0001 | 0.64 (0.48-0.84)          | 0.0014  |
| Current insulin dose (U/kg), time-dependent                     | 1.00 (0.70-1.43)          | 0.9962  | 0.77 (0.50-1.17)          | 0.2131  |
| History of hypoglycemia (coma and/or seizure) during DCCT (y/n) | 2.15 (1.64-2.82)          | <0.0001 | 3.18 (2.37-4.28)          | <0.0001 |
| Current HbA1c (%), time-dependent, per 10% decrease             | 1.28 (1.23-1.33)          | <0.0001 | 1.31 (1.26-1.36)          | <0.0001 |

  

| Coma and/or seizure                                             | Conventional              |         | Intensive                 |         |
|-----------------------------------------------------------------|---------------------------|---------|---------------------------|---------|
|                                                                 | Relative Risk<br>(95% CI) | p-value | Relative Risk<br>(95% CI) | p-value |
| Male (y/n)                                                      | 0.92 (0.66-1.27)          | 0.6106  | 1.02 (0.68-1.53)          | 0.9231  |
| Adolescent (y/n)                                                | 1.67 (1.12-2.50)          | 0.0118  | 0.97 (0.57-1.63)          | 0.9046  |
| Secondary cohort (y/n)                                          | 1.29 (0.85-1.94)          | 0.2308  | 1.75 (0.91-3.38)          | 0.0958  |
| Duration of T1D (years)                                         | 0.98 (0.94-1.03)          | 0.4034  | 0.93 (0.86-1.00)          | 0.0664  |
| Current regimen (CSII/Standard), time-dependent                 | 0.63 (0.39-1.02)          | 0.0588  | 0.65 (0.30-1.41)          | 0.2760  |
| Current regimen (CSII/MDI), time-dependent                      | 0.61 (0.42-0.88)          | 0.0093  | 0.52 (0.36-0.74)          | 0.0003  |
| Current insulin dose (U/kg), time-dependent                     | 1.08 (0.63-1.85)          | 0.7872  | 0.60 (0.30-1.18)          | 0.1375  |
| History of hypoglycemia (coma and/or seizure) during DCCT (y/n) | 2.19 (1.61-2.99)          | <0.0001 | 4.81 (3.34-6.93)          | <0.0001 |
| Current HbA1c (%), time-dependent, per 10% decrease             | 1.29 (1.23-1.35)          | <0.0001 | 1.38 (1.29-1.47)          | <0.0001 |

CSII=Continuous subcutaneous insulin infusion; MDI=Multiple daily injections

Time to any event using discrete time intervals during EDIC (regardless of prior DCCT hypoglycemia). Information about EDIC events was collected for the 3-month window prior to the annual visit. All covariates are fixed effects at DCCT closeout, except for the designated time-dependent covariates. The relative risk, presented per 10% decrease in HbA1c, is 0.9<sup>β</sup>.



SUPPLEMENTARY DATA

**Supplementary Table S6. Major accidents and role of hypoglycemia in DCCT and EDIC**

|                                      | DCCT                                              |           | EDIC         |           |
|--------------------------------------|---------------------------------------------------|-----------|--------------|-----------|
|                                      | Conventional                                      | Intensive | Conventional | Intensive |
|                                      | Number of events (number related to hypoglycemia) |           |              |           |
| <b>Total accidents</b>               | 24 (9)*                                           | 27 (13)†  | 72 (15)*     | 71 (15)†  |
| <b>Number of subjects</b>            | 22                                                | 27        | 63           | 60        |
| Women                                | 10                                                | 7         | 24           | 27        |
| Men                                  | 12                                                | 20        | 39           | 33        |
| <b>Accident Type</b>                 |                                                   |           |              |           |
| Motor vehicle accidents: operator    | 13 (9)                                            | 15 (9)    | 28 (13)      | 26 (10)   |
| Motor vehicle accidents: nonoperator | 1 (0)                                             | 3 (0)     | 0 (0)        | 3 (1)     |
| Bicycle accidents                    | 2 (0)                                             | 1 (1)     | 1 (0)        | 4 (1)     |
| Accidents involving power tools      | 3 (0)                                             | 0 (0)     | 0(0)         | 2 (1)     |
| Sports-related accidents             | ---                                               | ---       | 6 (0)        | 7 (0)     |
| Accidents involving horses           | ---                                               | ---       | 3 (0)        | 2 (0)     |
| On-the job accidents                 | ---                                               | ---       | 6 (0)        | 4 (0)     |
| Falling accidents                    | ---                                               | ---       | 11 (1)       | 10 (2)    |
| Other accidents‡                     | 5 (0)                                             | 8 (3)     | 17 (1)       | 13 (0)    |
| <b>Role of hypoglycemia</b>          |                                                   |           |              |           |
| No role                              | 15                                                | 14        | 54           | 51        |
| Possible cause                       | 5                                                 | 5         | 4            | 7         |
| Probable cause                       | 0                                                 | 2         | 4            | 3         |
| Principal cause                      | 4                                                 | 6         | 7            | 5         |

Major accidents including all events that resulted in hospitalization or death. During the DCCT, clinics obtained all relevant information on all adverse events including hospital records, police reports, etc.

Numbers in parentheses are events related to hypoglycemia (as possible, probable, or principal cause). Only non-fatal events are assigned a role of hypoglycemia in EDIC.

\* Includes 1 accidental death during DCCT (MVA) and 2 during EDIC (MVA, CO poisoning).

† Includes 3 accidental deaths during DCCT (all MVA) and 5 during EDIC

SUPPLEMENTARY DATA

Supplementary Figure S1. Proportion of severe hypoglycemic events (left) or subset resulting in coma and/or seizure (right) during (A) DCCT and (B) EDIC. Black bars represent the intensive group. White bars represent the conventional group.

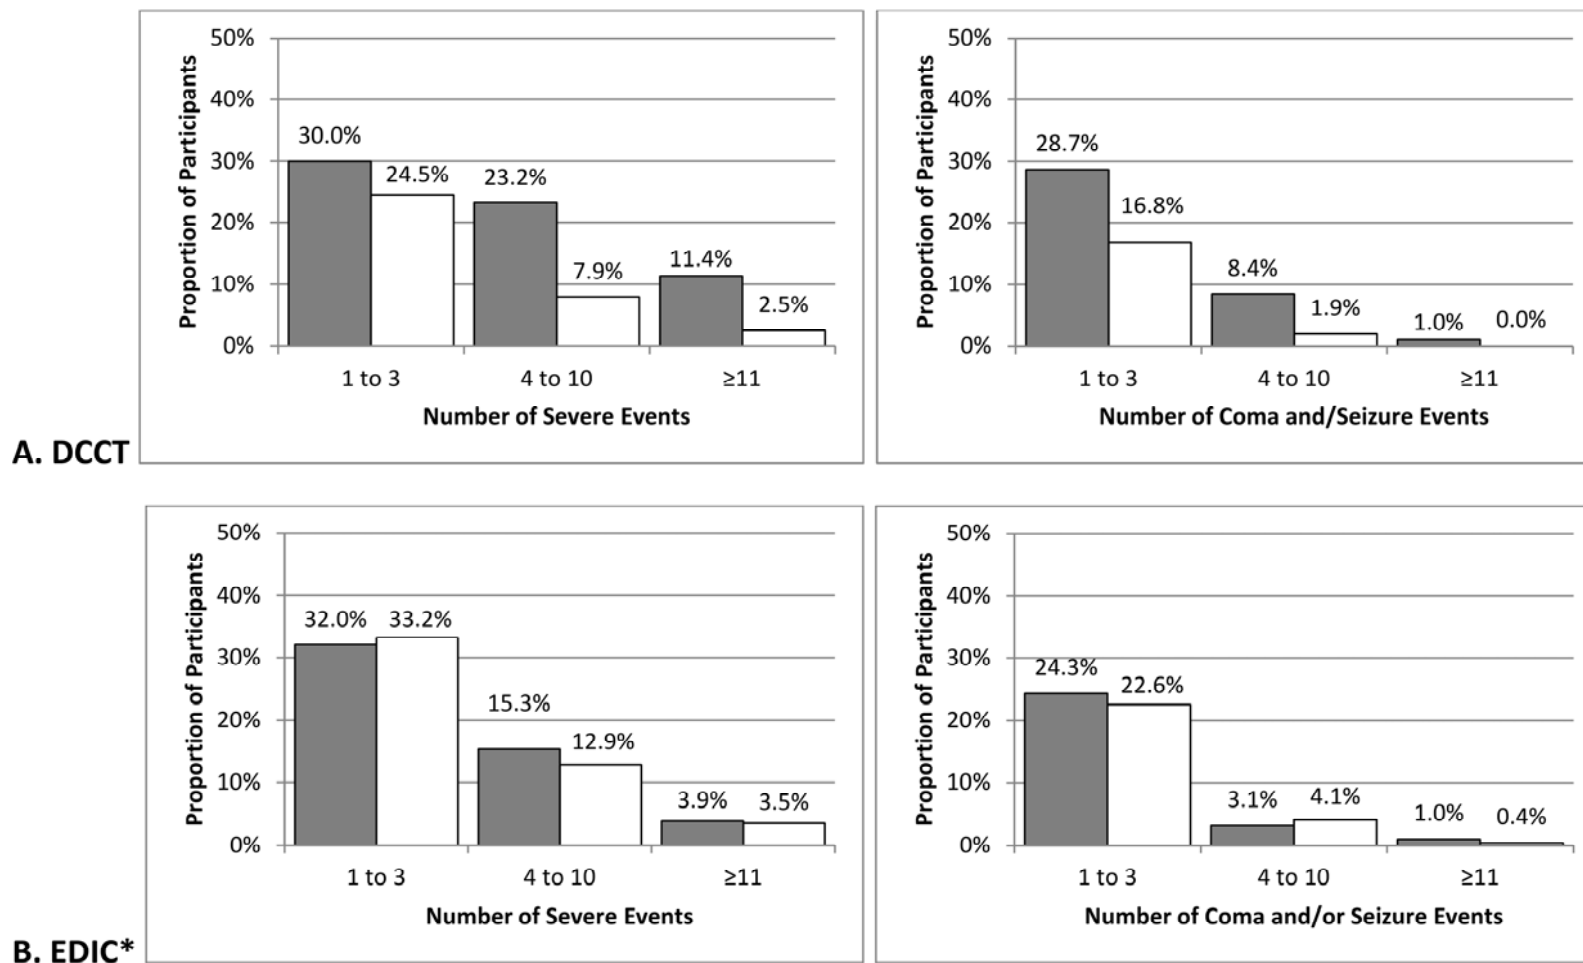

\*Proportion of participants with an event in 3-month interval prior to annual visit

SUPPLEMENTARY DATA

**Supplementary Figure S2. Cumulative percentage of subjects with (A) any severe hypoglycemia (first episode) and (B) resulting in coma and/or seizure, using discrete time intervals during EDIC (regardless of prior DCCT hypoglycemia). Numbers in parentheses represent subjects who are at risk of suffering a first episode. Information about EDIC events was collected for the 3-month interval prior to the annual visit. The EDIC period is based on N=699 subjects in the intensive group and N=708 subjects in the conventional group (N=34 subjects who were originally enrolled in the DCCT, did not have an EDIC visit).**

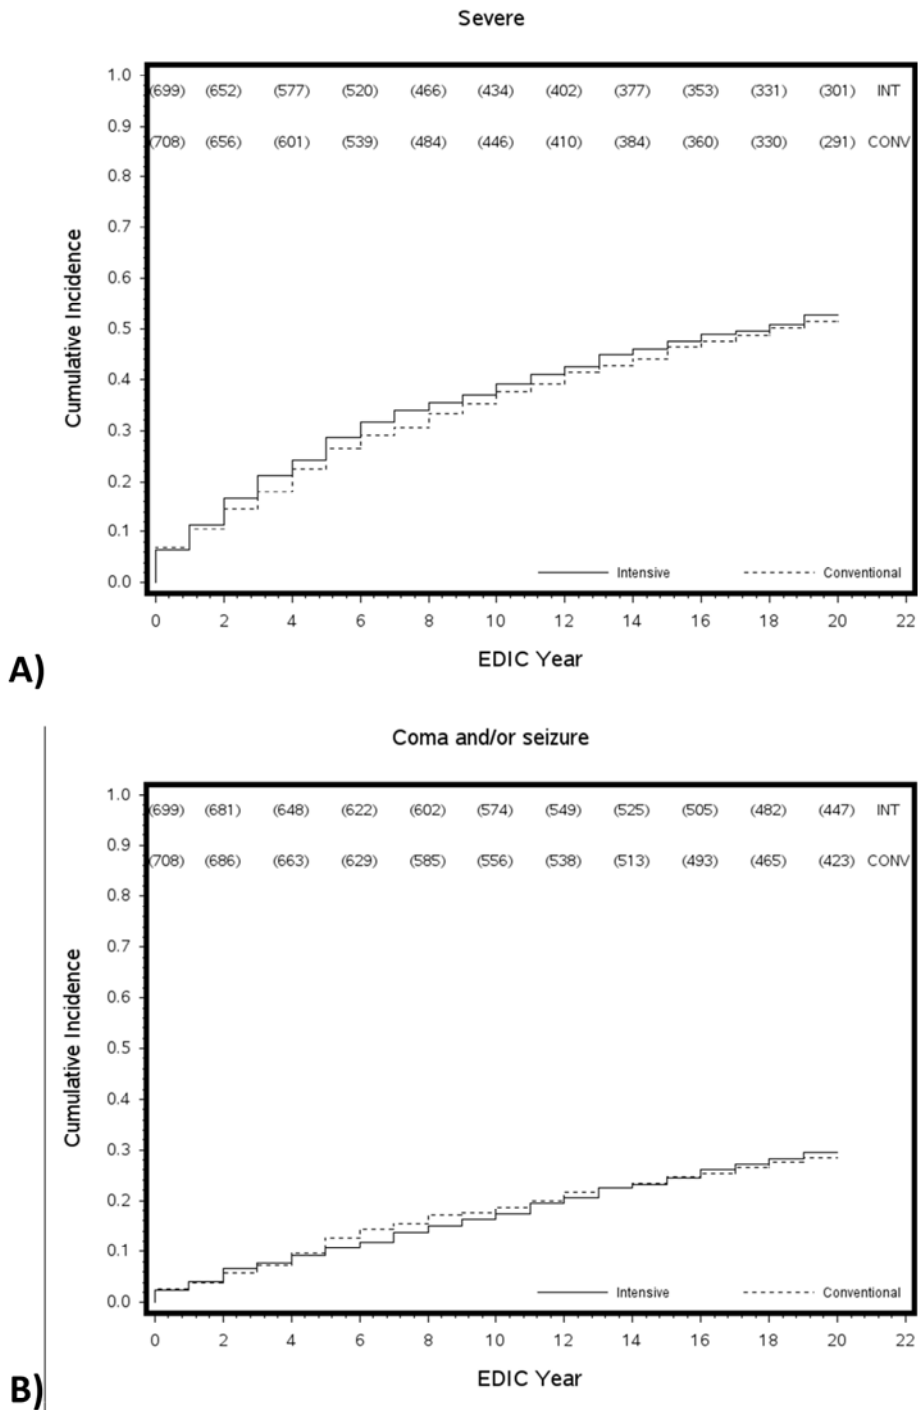

Supplement: DC162723SupplementaryData.pdf [file DC162723SupplementaryData.pdf]
